# Supplementary material
Source: PubMed Central journal article supplement (PMC3640459)
Supplement: NIHMS438147-supplement-supplement_data.pdf [file NIHMS438147-supplement-supplement_data.pdf]

**Supplementary Figure 1. Serum cytokine levels in patients with HNSCC and controls.** **A**, Serum levels of the indicated cytokines in patients with HNSCC and pleomorphic adenoma (non-cancer control). **B**, Comparison of serum TGF- $\beta$ 1 levels in non-cancer controls and patients with HNSCC at the time of new diagnosis and at the time of recurrence. **C**, Comparison of serum levels of TGF- $\beta$ 1 in patients with HPV-negative HNSCC at the time of diagnosis, and at two time points after the completion of treatment.

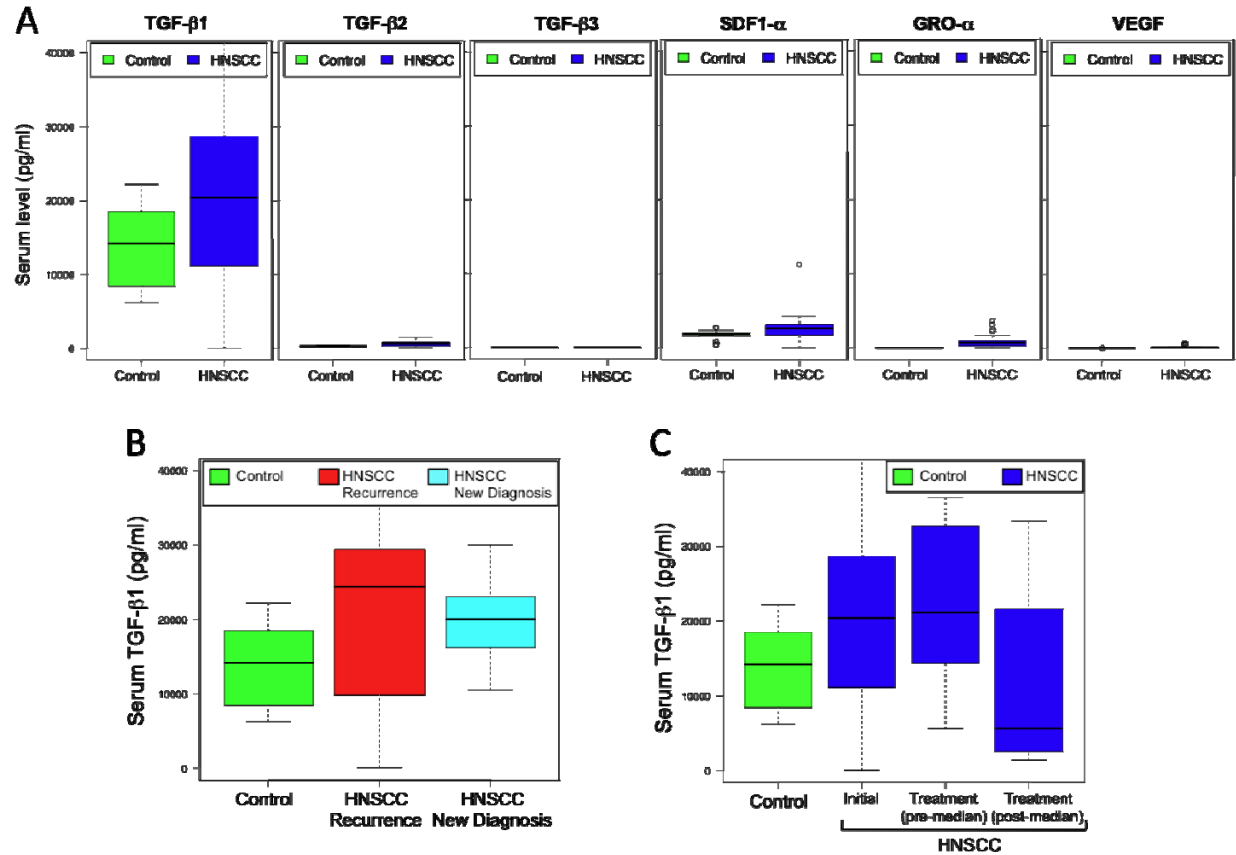

## Supplementary Table 1

### Clinical characteristics of patients with HNSCC

|                 | <b>New Diagnosis (N=36)</b> | <b>Recurrence (N=11)</b> |
|-----------------|-----------------------------|--------------------------|
| <b>Sex</b>      |                             |                          |
| Male            | 24                          | 10                       |
| Female          | 12                          | 1                        |
| <b>Subsites</b> |                             |                          |
| Oral Cavity     | 11                          | 3                        |
| Oropharynx      | 22                          | 1                        |
| Larynx          | 3                           | 4                        |
| Hypopharynx     | 0                           | 3                        |
| <b>T Stage</b>  |                             |                          |
| T1/T2           | 29                          | 6                        |
| T3/T4           | 7                           | 5                        |
| <b>N Stage</b>  |                             |                          |
| N0              | 6                           | 8                        |
| N <sup>+</sup>  | 30                          | 3                        |
| <b>HPV</b>      |                             |                          |
| Positive        | 18                          | 0                        |
| Negative        | 18                          | 11                       |

**Supplementary Table 2. Tumor HPV status and serum TGF- $\beta$ 1 levels of HNSCC patients.**

| <b>Plasma ID</b> | <b>HPV Status</b> | <b>TGF-<math>\beta</math>1 level</b> |
|------------------|-------------------|--------------------------------------|
| 836              | +                 | 15400                                |
| 1282             | -                 | 20000                                |
| 1406             | +                 | 137                                  |
| 1561             | -                 | 19000                                |
| 2208             | -                 | 19400                                |
| 2613             | -                 | 25000                                |
| 2712             | -                 | 44900                                |
| 2745             | +                 | 10702                                |
| 2774             | +                 | 24500                                |
| 2775             | -                 | 10500                                |
| 3808             | -                 | 15600                                |
| 3827             | +                 | 28200                                |
| 3959             | -                 | 17800                                |
| 3966             | -                 | 37900                                |
| 4227             | +                 | 11600                                |
| 4384             | +                 | 7100                                 |
| 4785             | +                 | 8790                                 |
| 5023             | -                 | 2530                                 |
| 5333             | -                 | 2100                                 |
| 7853             | +                 | 5270                                 |
| 8997             | +                 | 3990                                 |
| 9309             | +                 | 5210                                 |
| 13207            | -                 | 24900                                |
| 13300            | -                 | 24300                                |
| 14982            | -                 | 10700                                |
| 15220            | -                 | 9040                                 |
| 15247            | +                 | 11700                                |
| 18419            | -                 | 21929                                |
| 21539            | -                 | 32600                                |
| 22475            | -                 | 30000                                |
| 22485            | -                 | 27400                                |
| 23909            | +                 | 28800                                |
| 25798            | -                 | 20100                                |
| 26425            | -                 | 28500                                |
| 29338            | -                 | 28000                                |
| 30514            | -                 | 36400                                |
| 30535            | +                 | 45100                                |
| 30613            | -                 | 32600                                |
| 30764            | +                 | 61.7                                 |
| 30848            | -                 | 25600                                |
| 31140            | -                 | 33600                                |
| 31246            | +                 | 38900                                |
| 31353            | -                 | 16800                                |
| 31632            | -                 | 30000                                |
| 32843            | -                 | 46200                                |
| 3944_1P          | +                 | 17900                                |
| 3957_1P          | -                 | 20400                                |
| 4020_1P          | +                 | 30300                                |
| 4036_1P          | -                 | 26234                                |
